# Supplementary material
Source: publisher figshare collection journal article supplement (https://acs.figshare.com/ndownloader/files/11070506)
Supplement: Supplementary file 1 [file 11070506]

**Supporting Information for:**  
**“Evaluating environmental governance along cross-border electricity supply chains with policy-informed life cycle assessment: the California-Mexico energy exchange”**

Jose Bolorinos\*, Newsha K. Ajami\*, Gabriela Muñoz Meléndez, Robert B. Jackson

Stanford University,

CA, USA, 94305

\*Corresponding authors

Jose Bolorinos:

Department of Civil and Environmental Engineering,

Stanford University,

Email: [jbolorin@stanford.edu](mailto:jbolorin@stanford.edu)

Phone: +1-650-784-8257

Newsha K. Ajami:

Woods Institute for the Environment,

Bill Lane Center for the American West,

Stanford University

Email: [newsha@stanford.edu](mailto:newsha@stanford.edu)

Phone: +1-650-724-8162

## **Description of supplement**

The **Life Cycle Assessment** section of this supplement provides details on the methods used to estimate life cycle GHG, water withdrawal and air quality impacts per kWh of electricity exported from Mexico to California. Reference to a parameter as a range of values indicates that the parameter in question was part of the sensitivity analysis. The **Sensitivity Analysis** section describes the parameters varied and their assumed input distribution and values. This supplement contains 26 pages (S1-S26), 10 tables (**Table S1 – Table S10**) and 2 figures (**Figure S1** and **Figure S2**)

## Life Cycle Assessment

### Natural Gas Extraction

Equation (S1) is used to compute the impact of category  $i$  ( $Impact_i$ ) associated with natural gas well preparation and extraction:

$$(S1) \text{ } Impact_{extr,i} = \frac{HR * CoProd}{HC * (1-F)} * \left( \frac{\frac{Events}{well\ lifetime} * IF_{well,i}}{EUR} + IF_{prod,i} \right)$$

Equation (S1) takes the environmental impact factor of a given category ( $IF_{well,i}$ ) applied a given number of times over the life-time of a well, normalizes it by Estimated Ultimate Recover ( $EUR$ ), and adds the corresponding production stage impact factor ( $IF_{prod,i}$ ). This impact is then adjusted to account for allocation of natural gas liquid (NGL) coproducts ( $CoProd$ ), the expected fraction of pipeline-grade produced gas that reaches the power plant ( $F$ ), the heat content of the gas ( $HC$ ), and the efficiency of the power plant ( $HR$ ).

Well completion events are assumed to occur once per lifetime of a well, with a recompletion frequency of 0.01/year and a 30 year well lifetime as in Heath et al 2014<sup>1</sup>. The  $EUR$  values used in the model are basin-specific and based on EIA and USGS assessments of existing and emerging gas resources<sup>2-5</sup> (shown in **Table S1**). Impact is allocated to coproducts based on prior estimates of the weight fraction of natural gas liquids (NGLs) comprising the gas in each basin<sup>6,7</sup> (shown in **Table S3**). A production-weighted average is computed for each basin-specific parameter using the production figures given in **Table S2** and a generation-weighted average is computed for the  $HR$  value used in our model. We assume an  $HC$  value of 1,060 Btu/Scf, taken from an emissions inventory report for the San Juan and Permian basins<sup>6</sup>. When they differ by natural gas extraction type (i.e. unconventional vs. conventional gas) weighted average  $IF_{well,i}$  and  $IF_{prod,i}$  values are used to estimate of the share of

natural gas produced in each basin from unconventional wells. The value of  $F$  is obtained from estimates of pipeline transmission and storage losses, described in more detail below.

Direct emissions of CO<sub>2</sub> during well-site construction, produced water disposal, and well operation (including gas flaring) are calculated from the values and assumptions in Allen et al<sup>8</sup> and Logan et al<sup>9</sup> to obtain the  $IF_{prod,i}$  values summed over in equation (S1).

$$(S2) \quad IF_{k,i} = EF_k * ER * MW * GC_i * GWP, i \in (CO_2, VOC), k \in (well, prod)$$

CO<sub>2</sub>-eq/VOC emissions from leaking and venting during well completion/recompletion and liquids unloading sources are computed with equation (S2), which assumes an emissions factor for the given stage ( $EF_k$  for well preparation or production), an emissions reduction efficiency ( $ER$ ), and basin-specific gas composition parameters like molecular weight ( $MW$ ), compound share ( $GC_i$  for compound  $i$ ) and global warming potential ( $GWP$ ). Allen et al's<sup>8</sup> range of estimates of gas venting from well completions and the EPA estimate of 36.7 MScf/2.54 MScf vented per completion/workover of conventional wells<sup>10</sup> are used as the value of  $EF_k$ .  $ER$  values between 0 and 76% are assumed from EPA estimates of venting from conventional wells<sup>10</sup> and are assumed to be 0% for fractured wells (since estimates of venting from Allen et al<sup>8</sup> already account for emissions reductions) . We make use of an analysis of an American Petroleum Institute and American Natural Gas Association survey of liquids unloading from 43,000 conventional and unconventional wells with and without plunger lifts<sup>11</sup> provided in a harmonization study and sensitivity analysis by Heath et al<sup>12</sup> to produce a range of plausible CO<sub>2</sub>-eq emissions from liquids unloading. (the distribution of emissions values from liquids unloading used in the sensitivity analysis is shown in **Table S4**). Emissions from pneumatic devices and fugitive components are taken from ranges of values modeled by Allen et al<sup>8,13</sup>.

Estimates of  $IF_{well,i}$  in (S1) above for water withdrawals in the study basins are taken from harmonized values of water withdrawn for drilling and hydraulic fracturing provided in Meldrum et al

(shown in **Table S5**).  $IF_{prod,i}$  for water is assumed to be negligible for both conventional and unconventional natural gas wells, a reasonable assumption since the vast majority of water withdrawn during natural gas extraction is for well completions and recompletions.

Ranges of estimates of emissions of air pollutants per well and emissions per well-year given in several prior studies<sup>14,15</sup> are used to produce impact factors for air quality that account for emissions of  $NO_x$ , VOCs,  $PM_{10}/PM_{2.5}$  from well preparation and production, provided in Roy et al 2014<sup>15</sup>. The sum of the former and the product of the latter and well lifetime is taken as the value of  $IF_{well,i}$ , and similar values are assumed for conventional and unconventional gas development. Basin-level VOC composition estimates are applied to estimates of venting from completions, recompletions, liquids unloading and pneumatic devices/fugitives to obtain estimates of VOC emissions from gas wells that are consistent with estimates of gas leaks and venting.

**Table S1:** EUR ranges for study basins

| Basin                 | Mean EUR<br>(MMScf) | Minimum EUR<br>(MMScf) | Maximum EUR<br>(MMScf) |
|-----------------------|---------------------|------------------------|------------------------|
| Anadarko <sup>a</sup> | 3,151               | 1,657                  | 5,898                  |
| Permian <sup>a</sup>  | 2,054               | 833                    | 3,662                  |
| San Juan <sup>b</sup> | 685                 | 562                    | 846                    |

(Sources: <sup>a</sup>US Energy Information Administration 2011<sup>2</sup>; <sup>b</sup>US Energy Information Administration 2015<sup>16</sup>, using estimates of total recoverable resource from the USGS<sup>3-5</sup>)

**Table S2:** Basin-level production characteristics

| Basin    | 2013 Production<br>(MMScf) | %<br>Fracking*      | Estimated Ultimate<br>Recovery (MMScf/well) |
|----------|----------------------------|---------------------|---------------------------------------------|
| Anadarko | 136,085 <sup>a</sup>       | 44.43% <sup>a</sup> | 3,150 <sup>b</sup>                          |
| Permian  | 1,792,091 <sup>a</sup>     | 12.78% <sup>a</sup> | 2,054 <sup>b</sup>                          |
| San Juan | 1,024,962 <sup>a</sup>     | 25.81% <sup>a</sup> | 685 <sup>c</sup>                            |

(Sources: <sup>a</sup>US Energy Information Administration 2017<sup>17,18</sup>, \*based on 2015 production data; <sup>b</sup>US Energy Information Administration 2011<sup>2</sup>; <sup>c</sup>US Energy Information Administration 2015<sup>16</sup>)

**Table S3:** Basin-level gas composition

| Basin    | % CH <sub>4</sub> (mass) | % CO <sub>2</sub> (mass) | %VOC (mass)         | %NGL's (mass)       |
|----------|--------------------------|--------------------------|---------------------|---------------------|
| Anadarko | 79.70% <sup>a</sup>      | 1.57% <sup>a</sup>       | 9.93% <sup>a</sup>  | 6.56% <sup>a</sup>  |
| Permian  | 58.39% <sup>a</sup>      | 1.84% <sup>a</sup>       | 24.00% <sup>a</sup> | 12.64% <sup>a</sup> |
| San Juan | 75.80% <sup>b</sup>      | 5.00% <sup>b</sup>       | 7.40% <sup>b</sup>  | 11.70% <sup>b</sup> |

(Sources: <sup>a</sup> Texas Commission on Environmental Quality 2014<sup>19</sup>; <sup>b</sup> BLM 2016<sup>6</sup>)

**Table S4:** Liquids unloading emissions distribution

| Type                 | Percentile | Value (MMScf/well) |
|----------------------|------------|--------------------|
| Hydraulic Fracturing | 0%         | 0.01               |
| Hydraulic Fracturing | 5%         | 0.07               |
| Hydraulic Fracturing | 10%        | 0.20               |
| Hydraulic Fracturing | 25%        | 0.98               |
| Hydraulic Fracturing | 50%        | 5.10               |
| Hydraulic Fracturing | 75%        | 10.53              |
| Hydraulic Fracturing | 85%        | 29.17              |
| Hydraulic Fracturing | 90%        | 81.36              |
| Hydraulic Fracturing | 95%        | 172.47             |
| Hydraulic Fracturing | 100%       | 461.49             |
| Conventional         | 0%         | 0.06               |
| Conventional         | 5%         | 0.24               |
| Conventional         | 10%        | 0.38               |
| Conventional         | 25%        | 0.79               |
| Conventional         | 50%        | 2.32               |
| Conventional         | 75%        | 21.84              |
| Conventional         | 85%        | 34.31              |
| Conventional         | 90%        | 40.95              |
| Conventional         | 95%        | 122.85             |
| Conventional         | 100%       | 221.47             |

(Source: based on figures reported in Heath et al 2014<sup>12</sup>)

**Table S5:** Well drilling and hydraulic fracturing water withdrawal factors collected by Meldrum et al<sup>20</sup>  
(Adapted from the original source: Meldrum et al 2013<sup>20</sup>)

| Water Withdrawal<br>(gal/well) | Process       | Notes                         | Source                                                                  |
|--------------------------------|---------------|-------------------------------|-------------------------------------------------------------------------|
| 2.27E+06                       | Fracturing    | Barnett Shale                 | Joint Institute for Strategic Energy Analysis (JISEA) 2012 <sup>9</sup> |
| 4.50E+06                       | Fracturing    | Barnett Shale                 | Chesapeake Energy 2012a <sup>21</sup>                                   |
| 2.30E+06                       | Fracturing    | Barnett Shale                 | Clark et al 2011 <sup>22</sup>                                          |
| 3.80E+06                       | Fracturing    | Barnett Shale                 | Clark et al 2011 <sup>22</sup>                                          |
| 4.60E+06                       | Fracturing    | Barnett Shale                 | GAO 2012 <sup>23</sup>                                                  |
| 2.30E+06                       | Fracturing    | Barnett Shale                 | Ground Water Protection Council and ALL Consulting 2009 <sup>24</sup>   |
| 7.66E+05                       | Fracturing    | Barnett Shale                 | TWDB 2012 <sup>25</sup>                                                 |
| 1.19E+06                       | Fracturing    | Barnett Shale                 | TWDB 2012 <sup>25</sup>                                                 |
| 5.47E+06                       | Fracturing    | Barnett Shale                 | TWDB 2012 <sup>25</sup>                                                 |
| 3.75E+06                       | Fracturing    | Eagle Ford Shale              | Joint Institute for Strategic Energy Analysis (JISEA) 2012 <sup>9</sup> |
| 4.80E+06                       | Fracturing    | Eagle Ford Shale              | Chesapeake Energy 2012c <sup>26</sup>                                   |
| 5.00E+06                       | Fracturing    | Eagle Ford Shale              | GAO 2012 <sup>23</sup>                                                  |
| 1.22E+06                       | Fracturing    | Eagle Ford Shale              | TWDB 2012 <sup>25</sup>                                                 |
| 8.96E+06                       | Fracturing    | Eagle Ford Shale              | TWDB 2012 <sup>25</sup>                                                 |
| 2.50E+05                       | Well drilling | Barnett Shale                 | Chesapeake Energy 2012a <sup>21</sup>                                   |
| 2.70E+05                       | Well drilling | Barnett Shale                 | Clark et al 2011 <sup>22</sup>                                          |
| 2.50E+05                       | Well drilling | Barnett Shale                 | GAO 2012 <sup>23</sup>                                                  |
| 4.00E+06                       | Well drilling | Barnett Shale                 | Ground Water Protection Council and ALL Consulting 2009 <sup>24</sup>   |
| 1.25E+05                       | Well drilling | Eagle Ford Shale              | Chesapeake Energy 2012c <sup>26</sup>                                   |
| 1.25E+05                       | Well drilling | Eagle Ford Shale              | GAO 2012 <sup>23</sup>                                                  |
| 8.51E+04                       | Well drilling | (generic)<br>Conventional gas | Clark et al 2011 <sup>22</sup>                                          |
| 1.17E+05                       | Well drilling | (generic)<br>Conventional gas | Clark et al 2011 <sup>22</sup>                                          |
| 2.93E+02                       | Well drilling | (generic)<br>Conventional gas | IEA 2012 <sup>27</sup>                                                  |
| 2.93E+02                       | Well drilling | (generic)<br>Conventional gas | IEA 2012 <sup>27</sup>                                                  |
| 6.50E+04                       | Well drilling | Generic                       | Chesapeake Energy 2012b <sup>28</sup>                                   |
| 6.00E+05                       | Well drilling | Generic                       | Chesapeake Energy 2012b <sup>28</sup>                                   |
| 1.30E+05                       | Well drilling | Generic<br>horizontal         | Noble Energy Inc and CSU 2012 <sup>29</sup>                             |
| 7.70E+04                       | Well drilling | Generic vertical              | Noble Energy Inc and CSU 2012 <sup>29</sup>                             |
| 2.97E+06                       | Well drilling | On-shore<br>conventional well | DOE 1983 <sup>30</sup>                                                  |

### Gathering, Processing, Transmission and Storage (GPTS)

Equation (S3) is used to compute the impact of category  $i$  ( $Impact_i$ ) associated with natural gas well preparation and extraction. Equation (S4) is used to estimate the fraction of pipeline gas that makes it to the power plant ( $F$ ), which is applied to impact estimates of natural gas extraction in (S1), and GPTS in (S5):

$$(S3) Comb_{GPTS} = \frac{3.6MJ*kWh^{-1}}{1.12*10^6MJ*MMSCF^{-1}*Eff} * \left( PI_{comp} + \frac{PI_{trans}*Miles_{epng}}{TP*CF} \right)$$

$$(S4) F = 1 - LR - Comb_{GPTS}$$

Equation (S3) computes the fraction of processed gas entering the transmission system that is combusted to power compressor stations ( $Comb_{GPTS}$ ), based on the power required to compress a standard cubic foot of gas ( $PI_{comp}$ ), the power required to maintain 1 mile of pipeline under pressure ( $PI_{trans}$ ), the miles in EPNG's transmission network ( $Miles_{epng}$ ), the total rated throughput of the EPNG network ( $TP$ , in MMScf/year), its assumed operating capacity factor ( $CF$ ), and heat conversion efficiency of the network's compressors ( $Eff$ ). Gas combusted in the transmission and storage network, along with system-level leakage rate ( $LR$ ) is used to compute the fraction of processed gas that arrives at the power plant ( $F$ ) in equation (S4).

The analysis assumes a  $PI_{comp}$  value of 10kWh/MMBtu of gas compressed to 4,000 psi given by the American Gas Association<sup>31</sup>, and a  $PI_{trans}$  of 0.08kWh/mile<sup>32</sup>, and makes use of data on the size and annual throughput rating of EPNG's transmission network from Kinder Morgan<sup>33</sup> and the EIA<sup>34</sup> to produce values of  $Miles_{epng}$  and  $TP$ . Compressors generally operate at a capacity factor ( $CF$ ) of 40%-80%<sup>15</sup> and a thermal efficiency of 20%-40% depending on whether they are reciprocating or centrifugal<sup>35</sup> (efficiencies for each type are taken from Greenblatt 2015<sup>36</sup>). A weighted average  $CF$  is computed using survey data on compressor characteristics from Zimmerle et al (shown in **Table S6**). An updated

methane leakage rate of 0.3%-0.5% is assumed for gas transmission and storage<sup>37</sup> as well as new estimates of gas leaks during gathering and processing<sup>38</sup>.

$$(S5) \text{Impact}_{GPTS,i} = \frac{HR}{F} * \left( Comb_{pt\&s} * HC * \frac{0.0335bhp}{MMBtu} * IF_i \right)$$

The impact of each category ( $\text{Impact}_{t\&s,i}$  for category  $i$ ) is estimated in (S5) using the values computed in (S3) and (S4), the heat content ( $HC$ ) of 1,060 Btu/Scf assumed for the region<sup>6</sup>, and the corresponding impact factor  $IF_i$ . For processing, an  $IF_i$  value of 18g CO<sub>2</sub>-eq/kWh taken from Logan et al 2012<sup>39</sup> is used. Emissions factors of CO<sub>2</sub> and atmospheric contaminants from compressor engines (shown in **Table S7**) vary by engine type (reciprocating or centrifugal) and prime mover type (lean-burn 2-stroke, lean-burn 4-stroke, rich-burn 4-stroke or combustion turbine, or electric) and weighted average  $IF_i$  values are also calculated using survey data from Zimmerle et al<sup>40</sup>. Ranges of NO<sub>x</sub>, VOC and PM emissions during gas processing are taken from Roy et al<sup>15</sup>. CO<sub>2</sub>-equivalent emissions from PT&S system leakages are also computed by assuming a pipeline methane content of 95% by mass. A small amount of water is used to cool compressor engines, (0 - 1.38E-03 gal/bhp-hr for reciprocating engines and 0.11 - 0.80 gal/bhp-hr for combustion turbines)<sup>41</sup>, and a weighted average range of values is computed to estimate water needs for gas compression



**Table S6:** Compressor breakdown

| Prime Mover        | Type          | Share of Capacity |
|--------------------|---------------|-------------------|
| Electric           | Electric      | 7.3%              |
| Combustion Turbine | Centrifugal   | 46.1%             |
| Lean 2-stroke      | Reciprocating | 33.2%             |
| Lean 4-stroke      | Reciprocating | 10.1%             |
| Lean 4-stroke      | Centrifugal   | 1.1%              |
| Rich 4-stroke      | Reciprocating | 2.2%              |

(Source: Zimmerle et al 2015<sup>42</sup>, based on reported compressor counts and capacities)

**Table S7:** Assumed compressor emission factors

| Prime Mover        | Type          | NOx Emission Factor (lb/bhp-hr) | VOC Emission Factor (lb/bhp-hr) | PM Emission Factor (lb/bhp-hr) |
|--------------------|---------------|---------------------------------|---------------------------------|--------------------------------|
| Combustion Turbine | Centrifugal   | 2.87E-03 <sup>a</sup>           | 2.20E-05 <sup>a</sup>           | 3.53E-04 <sup>a</sup>          |
| Lean 2-stroke      | Reciprocating | 8.47E+00 <sup>b</sup>           | 9.50E-01 <sup>b</sup>           | 1.50E-01 <sup>b</sup>          |
| Lean 4-stroke      | Reciprocating | 1.66E+00 <sup>b</sup>           | 5.10E-01 <sup>b</sup>           | 1.00E-02 <sup>b</sup>          |
| Lean 4-stroke      | Centrifugal   | 1.66E+00 <sup>b</sup>           | 5.10E-01 <sup>b</sup>           | 1.00E-02 <sup>b</sup>          |
| Rich 4-stroke      | Reciprocating | 1.28E+00 <sup>b</sup>           | 5.00E-02 <sup>b</sup>           | 3.00E-02 <sup>b</sup>          |

(Sources: <sup>a</sup> U.S. EPA 2017<sup>43</sup>; <sup>b</sup> BLM 2016<sup>6</sup>)

### Generation

$$(S6) \text{ Impact}_{gen,i} = HR * IF_{gen,i}$$

Equation (S6) is used to compute impact of each category accruing in the generation phase  $\text{Impact}_{gen,i}$ , based on the range of weighted average heat rates of the two power plants ( $HR$ , in  $MMBtu/kWh$ ) and the estimated generation impact factor  $IF_{gen,i}$ . The California Energy Commission's Quarterly Fuel and Emissions Report (QFER) provides production and fuel use data for these plants from 2007 onwards, which is used to obtain  $HR$  distributions for the power exported to California. Emissions data for these facilities are not available, but the Mexican plants are required to use the same air quality

control technologies as those in California<sup>44</sup> and thus likely have very similar emissions rates. Therefore, average emissions factors from EPA eGRID power plant-level operational data for all combined cycle facilities built after 2000 in the state of California are used to estimate emissions per MMBtu of fuel burned. VOC and PM emissions are not reported in the EPA eGRID database, so emission values for natural gas combustion turbines from Cai et al<sup>45</sup> are used. All assumed emissions factors are shown in **Table 1** in the article. Ranges of water consumption rates are obtained from USGS estimates of power plant water consumption in 2010<sup>46</sup> (shown in **Table S8**) and an estimation method based on Bolorinos et al<sup>47</sup> that uses water consumption factors of combined cycle facilities with recirculating cooling systems built after 2000 (described in more detail in the “Sensitivity Analysis” section).

**Table S8:** Water consumption factors of combined cycle facilities

| EIA Facility ID | Estimated Water Consumption Factor (gal/MMBtu) | Minimum Water Consumption Factor (gal/MMBtu) | Maximum Water Consumption Factor (gal/MMBtu) |
|-----------------|------------------------------------------------|----------------------------------------------|----------------------------------------------|
| 3604            | 70.3                                           | 59.5                                         | 86.6                                         |
| 7757            | 55.8                                           | 46.2                                         | 69.0                                         |
| 55047           | 83.6                                           | 71.9                                         | 101.6                                        |
| 55062           | 83.2                                           | 71.0                                         | 101.2                                        |
| 55065           | 60.4                                           | 51.6                                         | 75.9                                         |
| 55097           | 65.6                                           | 55.9                                         | 81.6                                         |
| 55098           | 122.2                                          | 104.6                                        | 150.5                                        |
| 55153           | 61.5                                           | 52.6                                         | 74.4                                         |
| 55200           | 65.6                                           | 52.5                                         | 78.7                                         |
| 55309           | 119.4                                          | 103.0                                        | 143.5                                        |
| 55545           | 60.1                                           | 51.3                                         | 73.0                                         |
| 10156           | 106.7                                          | 53.4                                         | 106.7                                        |
| 50541           | 94.9                                           | 71.2                                         | 94.9                                         |
| 55120           | 106.3                                          | 91.0                                         | 127.0                                        |
| 55129           | 67.5                                           | 55.7                                         | 91.1                                         |
| 55132           | 88.4                                           | 75.5                                         | 109.4                                        |
| 55176           | 44.5                                           | 38.6                                         | 55.0                                         |
| <b>EIA</b>      | <b>Estimated Water</b>                         | <b>Minimum Water</b>                         | <b>Maximum Water</b>                         |

| Facility ID | Consumption Factor (gal/MMBtu) | Consumption Factor (gal/MMBtu) | Consumption Factor (gal/MMBtu) |
|-------------|--------------------------------|--------------------------------|--------------------------------|
| 55182       | 55.6                           | 47.1                           | 66.9                           |
| 55215       | 61.0                           | 51.6                           | 76.8                           |
| 55217       | 43.0                           | 36.3                           | 52.7                           |
| 55299       | 23.8                           | 20.7                           | 28.9                           |
| 55457       | 55.7                           | 46.6                           | 69.2                           |
| 55123       | 58.8                           | 50.5                           | 72.2                           |
| 55124       | 69.4                           | 56.8                           | 98.8                           |
| 55137       | 53.7                           | 45.9                           | 65.1                           |
| 55146       | 55.4                           | 46.6                           | 68.3                           |
| 55168       | 61.4                           | 52.2                           | 75.6                           |
| 55200       | 65.6                           | 52.5                           | 78.7                           |
| 55223       | 58.3                           | 49.2                           | 73.2                           |
| 55225       | 57.9                           | 48.6                           | 71.5                           |
| 55226       | 56.9                           | 48.4                           | 70.9                           |
| 55282       | 66.0                           | 54.3                           | 92.7                           |
| 55299       | 23.8                           | 20.7                           | 28.9                           |
| 55327       | 61.8                           | 53.1                           | 74.4                           |
| 55333       | 55.5                           | 46.9                           | 67.8                           |
| 55455       | 66.3                           | 55.1                           | 88.3                           |
| 56349       | 78.6                           | 66.3                           | 101.9                          |
| 56350       | 67.6                           | 58.3                           | 82.0                           |
| 7266        | 66.2                           | 56.7                           | 82.7                           |
| 55151       | 26.2                           | 22.3                           | 31.7                           |
| 55182       | 55.6                           | 47.1                           | 66.9                           |
| 55225       | 57.9                           | 48.6                           | 71.5                           |
| 55295       | 63.0                           | 51.9                           | 82.2                           |
| 55306       | 65.4                           | 54.2                           | 86.5                           |
| 55357       | 59.3                           | 50.9                           | 71.6                           |
| 55358       | 56.7                           | 48.5                           | 68.7                           |
| 55400       | 51.3                           | 43.5                           | 62.4                           |
| 55464       | 2.5                            | 2.0                            | 3.1                            |
| 55480       | 63.0                           | 53.5                           | 79.0                           |
| 55481       | 63.1                           | 52.7                           | 83.0                           |
| 55501       | 58.9                           | 50.1                           | 72.7                           |
| 55518       | 55.4                           | 47.1                           | 66.9                           |
| 55664       | 64.4                           | 54.7                           | 79.4                           |
| 55952       | 81.4                           | 67.1                           | 112.6                          |
| 10156       | 106.7                          | 53.4                           | 106.7                          |
| <b>EIA</b>  | <b>Estimated Water</b>         | <b>Minimum Water</b>           | <b>Maximum Water</b>           |

| Facility ID | Consumption Factor (gal/MMBtu) | Consumption Factor (gal/MMBtu) | Consumption Factor (gal/MMBtu) |
|-------------|--------------------------------|--------------------------------|--------------------------------|
| 55372       | 64.5                           | 54.0                           | 87.4                           |
| 55464       | 2.5                            | 2.0                            | 3.1                            |
| 55835       | 50.0                           | 39.9                           | 63.7                           |
| 358         | 58.4                           | 50.2                           | 69.7                           |
| 8068        | 105.6                          | 87.4                           | 140.6                          |
| 10811       | 48.8                           | 40.2                           | 57.4                           |
| 55393       | 49.5                           | 41.9                           | 59.5                           |
| 55656       | 52.5                           | 44.3                           | 64.9                           |
| 55977       | 59.1                           | 46.0                           | 74.5                           |
| 55985       | 50.1                           | 42.9                           | 59.6                           |
| 56026       | 47.8                           | 41.8                           | 57.7                           |
| 56041       | 59.7                           | 51.9                           | 71.4                           |
| 56046       | 53.5                           | 46.0                           | 64.7                           |
| 358         | 58.4                           | 50.2                           | 69.7                           |
| 8068        | 105.6                          | 87.4                           | 140.6                          |
| 55230       | 56.3                           | 47.6                           | 70.5                           |
| 55309       | 119.4                          | 103.0                          | 143.5                          |
| 55343       | 59.6                           | 50.5                           | 75.8                           |
| 55970       | 50.0                           | 42.1                           | 61.5                           |
| 55985       | 50.1                           | 42.9                           | 59.6                           |
| 56078       | 59.2                           | 50.1                           | 73.3                           |
| 56298       | 58.9                           | 49.4                           | 72.2                           |
| 56349       | 78.6                           | 66.3                           | 101.9                          |
| 56350       | 67.6                           | 58.3                           | 82.0                           |
| 57564       | 53.4                           | 45.8                           | 68.7                           |
| 56349       | 78.6                           | 66.3                           | 101.9                          |
| 56350       | 67.6                           | 58.3                           | 82.0                           |
| 55853       | 24.6                           | 21.2                           | 29.2                           |
| 55853       | 24.6                           | 21.2                           | 29.2                           |

(Source: based on figures reported in Diehl et al 2013<sup>46</sup>)

### Manufacturing and construction of wind turbines:

Our examination of life-cycle impact estimates from manufacturing and construction in the case study region focuses on wind turbines. For GHG emissions, we rely on life-cycle GHG emissions values taken from a meta-analysis performed by Nugent and Sovacool<sup>48</sup>. Two of these values correspond to wind power from small wind turbines and were excluded from the analysis. Values of NO<sub>x</sub>, VOC and PM<sub>10/2.5</sub> emissions from manufacturing are not available (Turconi et al<sup>49</sup> provide estimates for the entire equipment life cycle but do not break them down further into manufacturing, construction and transportation). We thus do not estimate air quality impacts from construction of wind turbines or combined cycle natural gas facilities because disaggregated values are unavailable and estimating air quality impacts would require a more precise life-cycle inventory specific to Baja California.

Estimates of water withdrawals are taken from studies presented in Meldrum et al's harmonization study of life cycle water withdrawn for electricity (shown in **Table S9**). We take water withdrawal values for construction and manufacturing of 1.5MW-4.5MW turbines and assume the harmonized average capacity factor of 30% and plant lifetime of 20 years.

**Table S9:** Assumed water withdrawal factors collected by Meldrum et al<sup>20</sup> (Adapted from the original source: Meldrum et al 2013<sup>20</sup>)

| Generation Type            | Stage         | Source                                       | Life cycle water withdrawal equivalent (Gal/kWh) |
|----------------------------|---------------|----------------------------------------------|--------------------------------------------------|
| Combined Cycle Natural Gas | raw materials | Inhaber 2004 <sup>50</sup>                   | 2.60E-04                                         |
|                            | construction  | NETL 2010 <sup>51</sup>                      | 1.30E-04                                         |
| Wind                       | raw materials | Fthenakis and Kim <sup>52</sup> 2010         | 6.10E-04                                         |
|                            |               |                                              | 3.20E-02                                         |
|                            |               | Inhaber 2004 <sup>50</sup>                   | 3.50E-03                                         |
|                            |               |                                              | 5.30E-04                                         |
|                            | manufacturing | Elsam Engineering A/S 2004 <sup>53</sup>     | 2.00E-02                                         |
|                            |               |                                              | 6.30E-05                                         |
|                            |               |                                              | 2.50E-02                                         |
|                            |               | NETL 2012 <sup>54</sup>                      | 2.40E-02                                         |
|                            |               |                                              | 3.00E-02                                         |
|                            |               |                                              | 2.10E-02                                         |
|                            |               |                                              | 2.70E-02                                         |
|                            |               |                                              | 4.30E-03                                         |
|                            | construction  |                                              | 5.30E-03                                         |
|                            |               |                                              | 2.00E-03                                         |
|                            |               | Chataignere and Le Boulch 2003 <sup>55</sup> | 1.50E-02                                         |
|                            |               |                                              | 2.10E-02                                         |
|                            |               |                                              | 2.10E-02                                         |
|                            |               |                                              | 1.90E-02                                         |
|                            |               |                                              | 2.60E-02                                         |

## Sensitivity Analysis:

### Parameter Ranges

A sensitivity analysis is performed on all impact factors and stages to account for uncertainty in crucial input parameters at each phase. Following Heath et al<sup>12</sup>, we take well EUR and liquids unloading as the most critical parameters for GHG emissions during the extraction stage. EUR is especially significant as a way of normalizing impact per well for air contaminant emissions and water withdrawals. Ranges used for the study basins are shown in **Table S1** above. To further account for uncertainty in air contaminant emissions during well construction, the range of values calculated in Roy et al<sup>15</sup> in their work on the air quality effects of gas development in the Marcellus shale is applied to the study's LCA.

We also account for uncertainty in water withdrawn for drilling and hydraulic fracturing by considering the estimates collected and harmonized in Meldrum et al in their review of life cycle water withdrawals associated with the power sector<sup>20</sup>. These values are shown in **Table S5**. For the GPTS stage, we consider a range of estimates of compressor load factor, efficiency, water withdrawal factors, gathering/processing, and transmission/storage leakage rates, which we deemed the most important sources of uncertainty in estimating environmental impact. A large source of uncertainty in estimating water withdrawals from electricity generation is the water withdrawal factor of combined cycle electricity generation units. Values used for input distributions of water withdrawal factors are shown in **Table S8**, and are adapted from an appendix to a USGS study by Diehl et al<sup>46</sup>.

### Parameter Input Distributions

**Table S10** shows the method used to generate each type of input parameter varied in the sensitivity analysis. All parameters were varied independently according to their input distributions, (except Manufacturing and Construction GHG emissions, which are sampled from the same studies examined in Nugent and Sovacool<sup>48</sup>), each of which made as few assumptions as possible. Where studies give a simple range of values without a mid-point (or median) a uniform probability distribution

function (PDF) is used, otherwise a triangular PDF is used. For liquids unloading, a simple PDF of emissions from liquids unloading from conventional and unconventional wells is constructed based on data provided in the supporting information of a study by Heath et al<sup>12</sup>. The pdf consists of a series of discrete block probabilities with breakpoints at the percentiles shown in **Table S4** above. For well drilling and hydraulic fracturing, values shown in **Table S3** are randomly sampled with equal weights (other input distributions of this type are referred to a “Sampling” in **Table S10**). A log-normal distribution is fit to the range of heat rates observed at the Mexican power plants (from California Quarterly Fuel and Emissions Report (QFER) data) and is sampled to generate a distribution of heat rate values.

A two-stage sampling process based on a method used by Bolorinos et al<sup>47</sup> is employed to produce a range of generation cooling water withdrawal factors. First, a plausible range of water consumption factors is sampled from the values in **Table S8**, which are normalized USGS estimates of water consumed per unit of fuel used for combined cycle facilities with recirculating cooling tower systems in the US Southwest (i.e. in California, Nevada, Arizona, New Mexico, Texas, and Oklahoma) that came online on or after 2000. A coefficient of variation is obtained from this range of water consumption factors (relative to the median estimate in the range). In the second stage, a value is sampled from a log-normal distribution with 2.5<sup>th</sup> and 97.5<sup>th</sup> quantiles corresponding to this coefficient of variation, and a median equal to the generation-weighted average point-estimate of water withdrawn per fuel used at the Mexican power plants obtained from data from the QFER (which is assumed to be a roughly accurate measure of the real water withdrawal factor).

Water consumption factors directly determine water withdrawal factors through the cycles of concentration of the cooling system, which refers to the ratio of blowdown (discharged) and makeup water flowing through the system<sup>56</sup>. The cooling system used at Termoelectrica de Mexicali is known to achieve 6-7 cycles of concentration<sup>44</sup>, and a similar performance is assumed for La Rosita. Thus, variation in estimates of consumption factors is assumed to determine variation in estimates of withdrawal



factors. Ranges of water withdrawal factors from the report by Diehl et al for the USGS<sup>56</sup> are not used because they are produced using a wider simulated range of cycles of concentration ranging (2 to 10) that are not reflective of the efficiency of the cooling systems used at the Mexican power plants.

**Figure S1** shows the distributions of environmental impact estimates resulting from the sensitivity analysis as a whole and broken down by stage and impact category. As the figure shows, some sources of uncertainty result in much larger variations in the magnitude of estimates and are the main determinants of uncertainty in overall life cycle impact.

**Figure S1** Sensitivity analysis distributions of environmental impact by stage and category

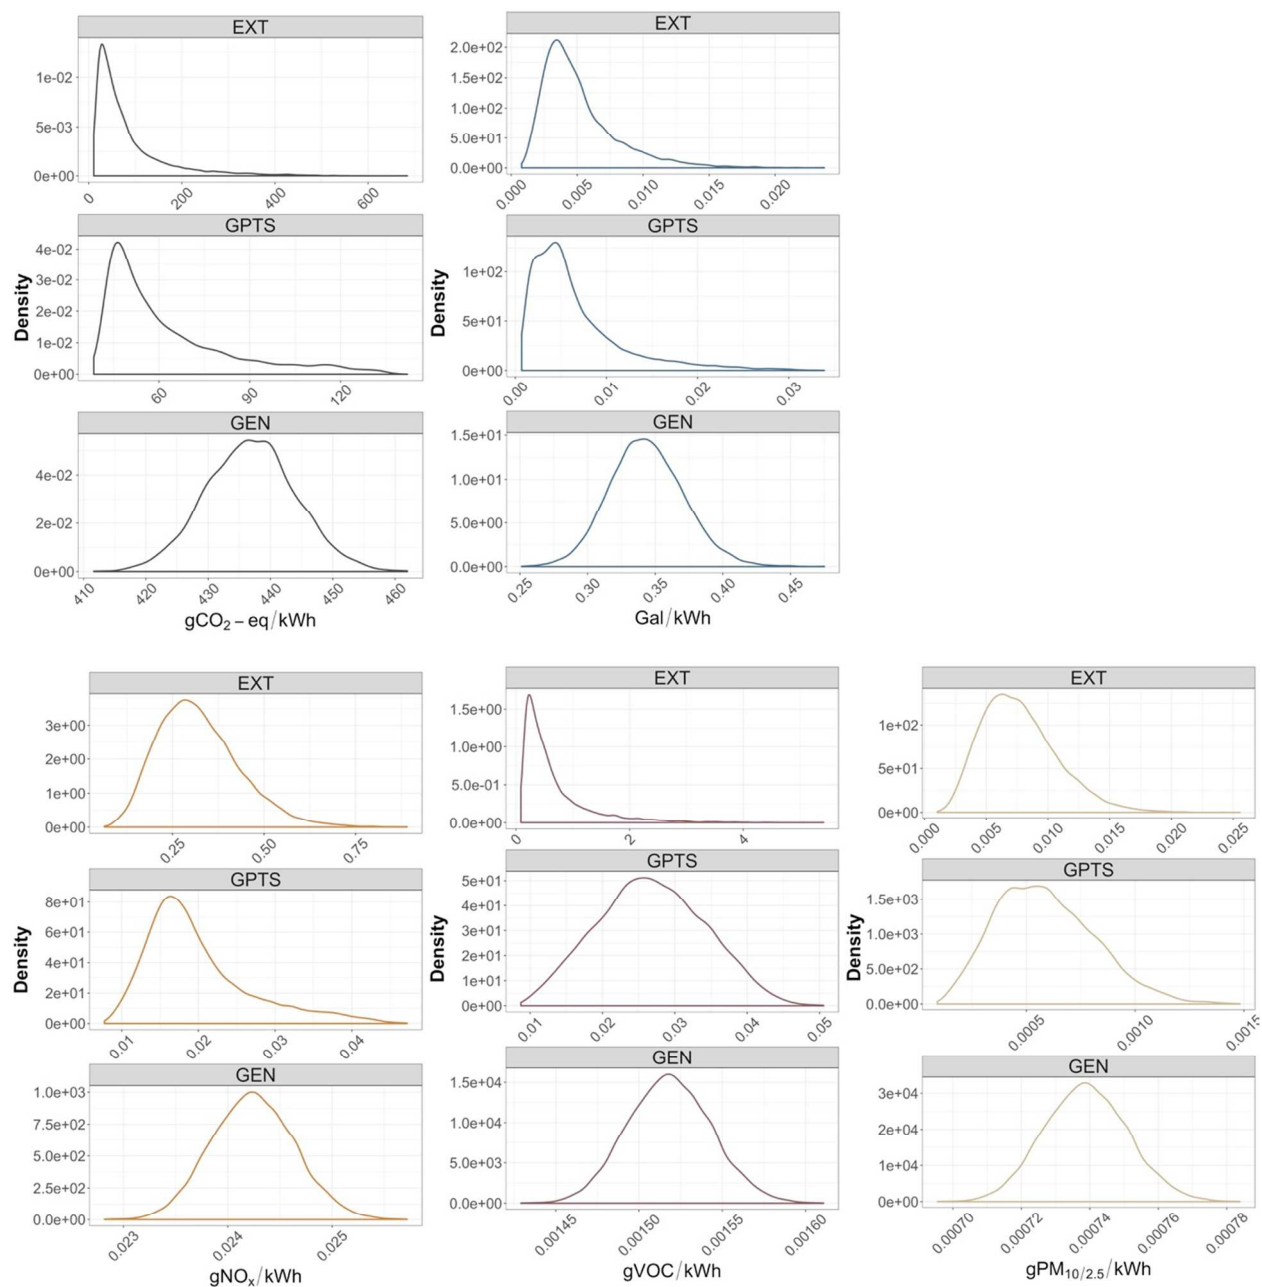

**Figure S2:** Sensitivity analysis distributions of GHG and Water Withdrawal impacts by stage (9.1% wind energy):

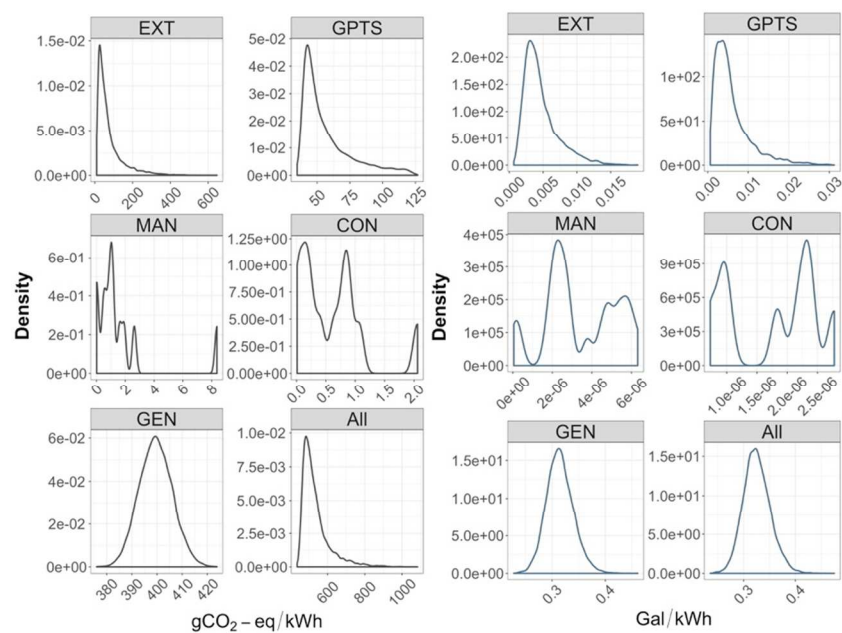

**Table S10:** Sensitivity analysis parameters and estimation (EXT: Extraction, GPTS: Gathering, Processing, Transmission & Storage, GEN: Generation)

| Stage | Parameter                             | Method                     |
|-------|---------------------------------------|----------------------------|
| EXT   | EUR                                   | PDF: triangular            |
|       | Completion Emissions                  | PDF: triangular            |
|       | Liquids Unloading Emissions           | PDF: block                 |
|       | Fugitive emissions                    | PDF: triangular            |
|       | Pneumatic component emissions         | PFF: triangular            |
|       | Drilling Water Withdrawal             | Sampling                   |
|       | Hydraulic Fracturing Water Withdrawal | Sampling                   |
|       | Air Quality Parameters                | PDF: triangular            |
| GPTS  | Transmission & Storage Leakage Rate   | PDF: triangular            |
|       | Gathering & Processing Leakage Rate   | PDF: triangular            |
|       | Compressor Efficiency                 | PDF: uniform               |
|       | Compressor Load Factor                | PDF: uniform               |
|       | Compressor Water Withdrawal Factor    | PDF: uniform               |
| GEN   | Heat Rate                             | PDF: log-normal            |
|       | Cooling Water Withdrawal Factor       | Sampling + PDF: log-normal |
| MAN   | Water Withdrawal Factor               | Sampling                   |
|       | GHG Emissions Factor                  | Sampling                   |
| CONST | Water Withdrawal Factor               | Sampling                   |
|       | GHG Emissions Factor                  | Sampling                   |

## References:

- (1) Arent, D.; Logan, J.; Macknick, J.; Boyd, W.; Medlock, K.; O'Sullivan, F.; Edmonds, J.; Clarke, L.; Huntington, H.; Heath, G.; et al. A review of water and greenhouse gas impacts of unconventional natural gas development in the United States. *MRS Energy Sustain.* **2015**, 2 (E4).
- (2) *Review of Emerging Resources: U.S. Shale Gas and Shale Oil Plays*; U.S. Energy Information Administration, U.S. Department of Energy: Washington, DC, 2011.
- (3) Higley, D.; Gaswirth, S. B.; Abbott, M. M.; Charpentier, R. R.; Hatch, J. R.; Klett, T. R.; Nelson, P.; Pawlewica, M. J.; Pearson, O. N.; Pollastro, R. M.; et al. *Assessment of undiscovered oil and gas resources of the Anadarko Basin Province of Oklahoma, Kansas, Texas, and Colorado, 2010*; U.S. Geological Survey: Washington, DC, 2011.
- (4) Schenk, C. J.; Pollastro, R. M.; Cook, T. A.; Pawlewicz, M. J.; Klett, T. R.; Charpentier, R. R.; Cook, H. E. *Assessment of Undiscovered Oil and Gas Resources of the Permian Basin Province of West Texas and Southeast*; U.S. Geological Survey: Washington, DC, 2008.
- (5) Flores, R. M.; Anna, L. O.; Dolton, G. L.; Fox, J. E.; French, C. D.; Charpentier, R. R. *National Assessment of Oil and Gas Fact Sheet Assessment of Undiscovered Oil and Gas Resources of the Powder River Basin Province of Wyoming and Montana , 2002*; U.S. Geological Survey: Washington, DC, 2002.
- (6) Tuers, C.; Moore, T.; Grant, J.; Parikh, R.; King, J.; Bar-Ilan, A. *San Juan and Permian Basin 2014 Oil and Gas Emission Inventory Inputs Final Report*; prepared for Bureau of Land Management, New Mexico State Office and Western States Air Resources Council: Santa Fe NM, 2014.
- (7) Pring, M.; Hudson, D.; Renzaglia, J.; Smith, B.; Treimel, S. *Characterization of Oil and Gas Production Equipment and Develop a Methodology to Estimate Statewide Emissions FINAL REPORT*; Austin, TX, 2016.
- (8) Allen, D. T.; Torres, V. M.; Thomas, J.; Sullivan, D. W.; Hendler, A.; Herndon, S. C.; Kolb, C. E.; Fraser, M. P.; Hill, A. D.; Lamb, B. K.; et al. Measurements of methane emissions at natural gas production sites in the United States. *Proc. Natl. Acad. Sci.* **2013**, 110 (44), 18023–18023.
- (9) Logan, J.; Heath, G.; Macknick, J.; Paranhos, E.; Boyd, W.; Carlson, K. *Natural Gas and the Transformation of the U.S. Energy Sector*; Golden, CO, 2012.
- (10) Oil and natural gas sector: New source performance standards and national emission standards for hazardous air pollutants reviews: Final Rule. *Fed. Regist.* **2012**, 77 (159), 49490–49600.
- (11) Shires, T.; Lev-On, M. *Characterizing Pivotal Sources of Methane Emissions from Natural Gas Production*; American Petroleum Institute and American Natural Gas Alliance: Washington, DC, 2012.
- (12) Heath, G. a.; O'Donoghue, P.; Arent, D. J.; Bazilian, M. Harmonization of initial estimates of shale gas life cycle greenhouse gas emissions for electric power generation. *Proc. Natl. Acad. Sci. U. S. A.* **2014**, Early Acce, E3167–E3176.
- (13) Allen, D. T.; Sullivan, D. W.; Zavala-Araiza, D.; Pacsi, A. P.; Harrison, M.; Keen, K.; Fraser, M. P.; Daniel Hill, A.; Lamb, B. K.; Sawyer, R. F.; et al. Methane emissions from process equipment at natural gas production sites in the United States: liquid unloadings. *Env. Sci Technol* **2014**, 49 (1), 641–648.

- (14) Litovitz, A.; Curtright, A.; Abramzon, S.; Burger, N.; Samaras, C. Estimation of regional air-quality damages from Marcellus Shale natural gas extraction in Pennsylvania. *Environ. Res. Lett.* **2013**, *8* (1), 14017.
- (15) Roy, A. A.; Adams, P. J.; Robinson, A. L. Air pollutant emissions from the development, production, and processing of Marcellus Shale natural gas. *J. Air Waste Manage. Assoc.* **2014**, *64* (1), 19–37.
- (16) *Top 100 U.S. Oil and Gas Fields*; U.S. Energy Information Administration, U.S. Department of Energy: Washington, DC, 2015.
- (17) *Shale Gas Production*; U.S. Energy Information Administration, U.S. Department of Energy: Washington, DC, 2017.
- (18) *Table 10: Total natural gas proved reserves, reserves changes, and production, wet after lease separation, 2015*; U.S. Energy Information Administration, U.S. Department of Energy: Washington, DC, 2017.
- (19) *Specified Oil & Gas Well Activities Emissions Inventory Update; Final Report*; prepared for Texas Commission on Environmental Quality by Eastern Research Group Inc; Austin, TX, 2014.
- (20) Meldrum, J, Nettles-Anderson, S, Heath, G, Macknick, J. Life cycle water use for electricity generation: a review and harmonization of literature estimates. *Environ. Res. Lett.* **2013**, *8* (15031), 1–18.
- (21) Chesapeake Energy. *Water Use in Barnett Deep Shale Gas Exploration*.
- (22) Clark, C.; Harto, J. S.; M., W. *Water Use in the Development and Operation of Geothermal Power Plants* ANL/EVS/R-10/5. Oak Ridge, TN, Argonne National Laboratory (ANL); 2011.
- (23) GAO. *Oil and Gas: Information on Shale Resources, Development, and Environmental and Public Health Risks*. GAO-12-732.; Washington, DC, 2012.
- (24) Ground Water Protection Council and ALL Consulting. *Modern Shale Gas Development in the United States: A Primer*, U.S. Department of Energy, Office of Fossil Energy and National Energy Technology Laboratory; 2009.
- (25) TWDB. *Water for Texas 2012 State Water Plan*; Austin, TX, 2012.
- (26) Chesapeake Energy. *Water Use in Eagle Ford Deep Shale Gas Exploration*.
- (27) IEA. *Golden Rules for a Golden Age of Gas: World Energy Outlook Special Report on Unconventional Gas*. WEO-2012; Paris, France, 2012.
- (28) Chesapeake Energy. *Water Use in Deep Shale Gas Exploration*.
- (29) Noble Energy Inc and CSU. *Lifecycle Analysis of Water Use and Intensity of Noble Energy Oil and Gas Recovery in Wattenberg Field of Northern Colorado*; Fort Collins, CO, 2012.
- (30) DOE. *Energy Technology Characterizations Handbook: Environmental Pollution and Control Factors*; Washington, DC, 1983.
- (31) Wang, M. Q.; Huang, H. S. *A Full Fuel-Cycle Analysis of Energy and Emissions Impacts of Transportation Fuels Produced from Natural Gas*; Argonne National Laboratory, Office of Technology Utilization, Office of Transportation Technologies, U.S. Department of Energy:

Washington DC, 1999; Vol. ESD.

- (32) King, C. W.; Webber, M. E. Water intensity of transportation. *Environ. Sci. Technol.* **2008**, 42 (21), 7866–7872.
- (33) Kinder Morgan. El Paso Natural Gas / Mojave Pipeline [https://www.kindermorgan.com/business/gas\\_pipelines/west/EPNG\\_MP/](https://www.kindermorgan.com/business/gas_pipelines/west/EPNG_MP/) (accessed Jan 1, 2017).
- (34) *Natural gas compressor stations on the interstate pipeline network: Developments since 1996*; Energy Information Administration, Office of Oil and Gas; Washington, DC, 2007.
- (35) Greenblatt, J. B.; Wei, M. Assessment of the climate commitments and additional mitigation policies of the United States. *Nat. Clim. Chang.* **2016**, 6, 1090–1093.
- (36) Greenblatt, J. B. *Opportunities for Efficiency Improvements in the U . S . Natural Gas Transmission , Storage and Distribution System*; Berkeley, CA, 2015.
- (37) Zimmerle, D. J.; Williams, L. L.; Vaughn, T. L.; Quinn, C.; Subramanian, R.; Duggan, G. P.; Willson, B.; Opsomer, J. D.; Marchese, A. J.; Martinez, D. M.; et al. Methane Emissions from the Natural Gas Transmission and Storage System in the United States. *Environ. Sci. Technol.* **2015**, 49 (15), 9374–9383.
- (38) Marchese, A. J.; Vaughn, T. L.; Zimmerle, D. J.; Martinez, D. M.; Williams, L. L.; Robinson, A. L.; Mitchell, A. L.; Subramanian, R.; Tkacik, D. S.; Roscioli, J. R.; et al. Methane Emissions from United States Natural Gas Gathering and Processing. *Environ. Sci. Technol.* **2015**, 49 (17), 10718–10727.
- (39) Logan, J.; Heath, G.; Paranhoset, E.; Boyd, W.; Carlson, K. *Natural Gas and the Transformation of the U.S. Energy Sector: Electricity*; Joint Institute for Strategic Energy Analysis, 2012.
- (40) Subramanian, R.; Williams, L. L.; Vaughn, T. L.; Zimmerle, D.; Roscioli, J. R.; Herndon, S. C.; Yacovitch, T. I.; Floerchinger, C.; Tkacik, D. S.; Mitchell, A. L.; et al. Methane emissions from natural gas compressor stations in the transmission and storage sector: Measurements and comparisons with the EPA greenhouse gas reporting program protocol. *Environ. Sci. Technol.* **2015**, 49 (5), 3252–3261.
- (41) McKinney, J. *2007 Environmental Performance Report of California's Electrical Generation System - CEC-700-2007-016-SF*; California Energy Commission: Sacramento, CA, 2008.
- (42) Zimmerle, D. J.; Williams, L. L.; Vaughn, T. L.; Quinn, C.; Duggan, G. P.; Willson, B.; Opsomer, J. D.; Marchese, A. J. Methane emissions from the natural gas transmission and storage system in the United States -- Supporting Information. *Environ. Sci. Technol.* **2015**, 49 (15), 1–50.
- (43) U.S. Environmental Protection Agency. 3.1: Stationary Gas Turbines. **2017**, I (AP-42), 1–20.
- (44) *Informe de Sustentabilidad + Informe Financiero 2015*; IENova, México, D.F., 2015.
- (45) Cai, H.; Wang, M.; Elgowainy, A.; Han, J. *Updated Greenhouse Gas and Criteria Air Pollutant Emission Factors and Their Probability Distribution Functions for Electric Generating Units*; Argonne National Laboratory: Oak Ridge, TN, 2012.
- (46) Diehl, T. H.; Harris, M. A.; Murphy, J. C.; Hutson, S. S.; Ladd, D. E. *Methods for Estimating Water Consumption for Thermoelectric Power Plants in the United States*; 2013.

- (47) Bolorinos, J.; Ajami, N.; Yu, Y.; Rajagopal, R. Balancing ecosystem impact and freshwater conservation with water use fees in California's power sector: an evaluation of possibilities and trade-offs -- Submitted. *Appl. Energy* **2018**.
- (48) Nugent, D.; Sovacool, B. K. Assessing the lifecycle greenhouse gas emissions from solar PV and wind energy: A critical meta-survey. *Energy Policy* **2014**, *65*, 229–244.
- (49) Turconi, R.; Boldrin, A.; Astrup, T. Life cycle assessment (LCA) of electricity generation technologies: Overview, comparability and limitations. *Renew. Sustain. Energy Rev.* **2013**, *28*, 555–565.
- (50) Inhabber, H. Water Use in Renewable and Conventional Electricity Production. *Energy Sources* **2004**, *26*, 309–322.
- (51) National Energy Technology Laboratory (NETL). *Life Cycle Analysis: Natural Gas Combined Cycle (NGCC) Power Plant*; Pittsburg, PA, 2010.
- (52) Fthenakis, V.; Kim, H. C. Life-Cycle Uses of Water in U.S. Electricity Generation. *Renew. Sustain. Energy Rev.* **2010**, *14* (7), 2039–2048.
- (53) Elsam Engineering A/S. *Life Cycle Assessment of Offshore and Onshore Sited Wind Farms*; Frederica, Denmark, 2004.
- (54) National Energy Technology Laboratory (NETL). *Role of Alternative Energy Sources: Wind Technology Assessment*; Pittsburg, PA, 2012.
- (55) Chataignere, A.; Le Boulch, D. *Wind Turbine (Wt) Systems: Final Report. ECLIPSE: Environmental and Ecological Life Cycle Inventories for Present and Future Power Systems in Europe*; 2003.
- (56) Diehl, T. H.; Harris, M. A.; Murphy, J. C.; Hutson, S. S.; Ladd, D. E. Withdrawal and Consumption of Water by Thermoelectric Power Plants in the United States, 2010: U.S. Geological Survey Scientific Investigations Report 2014–5184: Appendix 1. **2014**.
